# Supplementary material for: Ultrasound-assisted extraction optimization and validation of an HPLC-DAD method for the quantification of polyphenols in leaf extracts of Cecropia species
Source: PubMed Central journal article supplement (PMC6375923; doi:10.1038/s41598-018-37607-2), 2019-02-14
Supplement: 41598_2018_37607_MOESM1_ESM.pdf [file 41598_2018_37607_MOESM1_ESM.pdf]

**Ultrasound-assisted extraction optimization and validation of an HPLC-DAD method  
for the quantification of polyphenols in leaf extracts of *Cecropia* species.**

Andrés Rivera-Mondragón<sup>a,\*</sup>, Géraldine Broeckx<sup>b</sup>, Sebastiaan Bijttebier<sup>a</sup>, Tania Naessens<sup>a</sup>, Erik Fransen<sup>c</sup>, Filip Kiekens<sup>b</sup>, Catherina Caballero-George<sup>d</sup>, Yvan Vander Heyden<sup>e</sup>, Sandra Apers<sup>a</sup>, Luc Pieters<sup>a</sup>, Kenn Foubert<sup>a</sup>

<sup>a</sup>Natural Products & Food Research and Analysis (NatuRA), Department of Pharmaceutical Sciences, University of Antwerp, Universiteitsplein 1, 2610, Antwerp, Belgium

<sup>b</sup>Laboratory of Pharmaceutical Technology and Biopharmacy, Department of Pharmaceutical Sciences, University of Antwerp, Universiteitsplein 1, 2610 Antwerp, Belgium

<sup>c</sup>StatUa Center for Statistics, University of Antwerp, Prinsstraat 13, 2000, Belgium.

<sup>d</sup>Centre of Innovation and Technology Transfer, Institute of Scientific Research and High Technology Services (INDICASAT-AIP), Building 208 and 219, City of Knowledge, Panama, Republic of Panama

<sup>e</sup>Department of Analytical Chemistry, Applied Chemometrics and Molecular Modelling, Vrije Universiteit Brussel–VUB, Laarbeeklaan 103, B-1090 Brussels, Belgium.

\*Corresponding author at:

Natural Products & Food Research and Analysis (NatuRA), Department of Pharmaceutical Sciences, University of Antwerp, Universiteitsplein 1, 2610 Antwerp, Belgium.

E-mail address: [andres.riveramondragon@student.uantwerpen.be](mailto:andres.riveramondragon@student.uantwerpen.be) (A. Rivera).

## S. Methods

### *HPLC-DAD and HPLC-DAD-MS analysis*

Quantification was performed by an external standard method, using CA, VX and RU as reference standards for validation process. TF-1 and TF-2 were quantified as VX-1 (detected at 340 nm) or RU equivalent, respectively, while FL was expressed as VX-2 (detected at 390 nm) equivalent.

$$C = \frac{\sum A_1 \cdot m_2 \cdot DF_1 \cdot p}{A_2 \cdot m_1 \cdot DF_2 \cdot (100 - d)} \quad (1)$$

where C is the concentration in  $\mu\text{g/g}$  of CA, TF-1, TF-2 or FL;  $\sum A_1$  is the area of the CA peak or the sum of the peak areas from TF-1, TF-2 or FL obtained with the test solution;  $A_2$  is the peak area of CA, VX or RU obtained with the reference solution;  $m_1$  is the mass of the plant material examined, in grams;  $m_2$  is the mass of CA, VX or RU in the reference solution, in micrograms;  $DF_1$  is the dilution factor of the test solution;  $DF_2$  is the dilution factor of the reference solution;  $p$  is the percentage content of CA, VX or RU in the reference standard;  $d$  is the percentage lost on drying of the plant material.

## *Experimental Designs*

### Fractional Factorial Design (FFD)

The following formulas were used:

$$E_x = \frac{\sum Y(+)-\sum Y(-)}{\frac{N}{2}} \quad (2)$$

$$S_0 = 1.5 \cdot \text{median } |E_x| \quad (3)$$

$$(SE)_e = \sqrt{\frac{\sum E_k^2}{m}} \quad (4)$$

$$E_{critical} = t_{(\alpha,df)} \cdot (SE)_e \leftrightarrow |E_x| \quad (5)$$

where  $\sum Y(+)$  and  $\sum Y(-)$  are the sums of the responses when factor  $x$  is at the (+) or (-) level, respectively;  $N$  is the number of design experiments ( $N = 16$ );  $E_k$  and  $m$  are the effects and number of effects (in absolute value)  $\leq 2.5 \cdot S_0$ . The critical effect ( $E_{critical}$ ) was determined with a number of degree of freedom ( $df = m$ ) and  $\alpha = 0.05$ . Values of  $|E_x|$  larger or equal to  $E_{critical}$  were considered significant.

### ***Validation of the analytical method***

#### *Linearity*

Mandel's fitting test

The first-order ( $y = a + bx$ ) and the second-order ( $y = a + bx + cx^2$ ) calibration functions, including their residual standard deviations ( $S_y$ ) were determined. The difference of the variance ( $DS^2$ ) and the test value ( $TV$ ) were calculated for the F-test as follows:

$$DS^2 = (N - 2)S_{y_1}^2 - (N - 3)S_{y_2}^2, df = 1 \quad (6)$$

$$TV = \frac{DS^2}{S_{y_2}^2} \quad (7)$$

where  $S_{y_1}^2$  and  $S_{y_2}^2$  are the residual standard deviations from the first- and second-order calibration functions, respectively; N is the number of calibration points.

TV was compared with the value obtained from an F table ( $f_1 = 1, f_2 = N - 3, P = 99\%$ ). If  $TV \leq F$ , the first-order calibration function provides no significant lack of fit and the second-order calibration function is not needed.

#### *Precision*

Relative standard deviation was calculated as follows:

$$RSD (\%) = (S/\bar{x}) \cdot 100 \quad (8)$$

where  $S$  is the standard deviation and  $\bar{x}$  is the arithmetic mean of the measurements.

The homogeneity of variance (homoscedasticity) between different days and concentration levels was calculated by means of a Cochran's C test:

$$C = \frac{S_{max}^2}{\sum_{i=1}^N S_i^2} \quad (9)$$

where  $C$  is the Cochran's C statistic value for the data series;  $S_{max}^2$  is the maximum variance of the data series;  $S_i^2$  are the variances from all data series. C values were compared with C critical values for Cochran's C at the 95% level of confidence.

## Accuracy

The recovery and 95% confidence interval (CI) were calculated as follows:

$$\text{Recovery \%} = \frac{X_{aft\ spiking} - X_{bef\ spiking}}{X_{added}} \times 100 \quad (10)$$

$$95\% \text{ CI} = \bar{x}_{Rec(\%)} \pm S \times \left[ \frac{t_{(1-\alpha/2, n-1)}}{\sqrt{n}} \right] \quad (11)$$

where  $X_{bef\ spiking}$  and  $X_{aft\ spiking}$  are the quantity of analyte in plant material extracts before and after the analytical standard is added, respectively;  $X_{added}$  is the quantity of added analytical standard;  $\bar{x}_{Rec(\%)}$  is the sample mean;  $S$  is the sample standard deviation;  $t_{(1-\alpha/2, n-1)}$  is t-value for 95 % confidence with n-1 degree of freedom; and  $n$  is the number of samples.

## Limit of detection (LoD) and limit of quantification (LoQ)

The limits of detection and of quantification were estimated based on analytical calibration curves containing the analytes (CA, VX and RU) spiked to the sample extracts. According to the following equations:

$$LoD = \frac{3.3 \sigma}{S} \quad (12)$$

$$LoQ = \frac{10 \sigma}{S} \quad (13)$$

where  $\sigma$  and  $S$  are the standard deviation of intercept and slope of the different calibration curves of analytes, respectively.

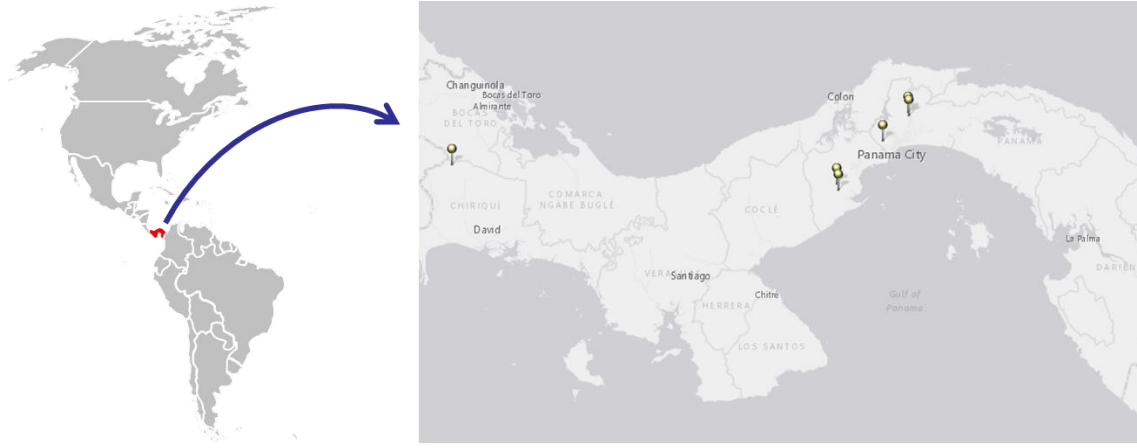

| ID   | Specie                 | Author   | Voucher specimen | Province                    | Inflorescence | Coordinates             | Date       |
|------|------------------------|----------|------------------|-----------------------------|---------------|-------------------------|------------|
| CO-1 | <i>C. obtusifolia</i>  | Bertol.  | 2519             | Panama (Cerro Azul)         | Pistillate    | 9°12'33" N, 79°24'49" W | 10/11/2015 |
| CO-2 | <i>C. obtusifolia</i>  | Bertol.  | 2616             | Panama (Cerro Azul)         | Pistillate    | 9°11'10" N, 79°24'21" W | 07/21/2016 |
| CO-3 | <i>C. obtusifolia</i>  | Bertol.  | 2623             | Panama (Cerro Azul)         | Staminate     | 9°11'10" N, 79°24'21" W | 07/21/2016 |
| CO-4 | <i>C. obtusifolia</i>  | Bertol.  | 2527             | West Panama (Cerro Campana) | Pistillate    | 8°41'11" N, 79°55'19" W | 10/17/2015 |
| CO-5 | <i>C. obtusifolia</i>  | Bertol.  | 2620             | West Panama (Cerro Campana) | Pistillate    | 8°41'21" N, 79°54'55" W | 07/22/2016 |
| CO-6 | <i>C. obtusifolia</i>  | Bertol.  | 2622             | Panama (Cerro Azul)         | Undetermined  | 9°11'10" N, 79°24'21" W | 07/21/2016 |
| CO-7 | <i>C. obtusifolia</i>  | Bertol.  | 2741             | Chiriquí                    | Staminate     | 8°49'32" N, 82°41'02" W | 07/22/2016 |
| CP-1 | <i>C. peltata</i>      | L.       | 2521             | Panama (Camino de Cruces)   | Pistillate    | 9°00'40" N, 79°35'44" W | 10/11/2015 |
| CP-2 | <i>C. peltata</i>      | L.       | 2625             | Panama (Camino de Cruces)   | Pistillate    | 9°00'40" N, 79°35'44" W | 07/21/2016 |
| CP-3 | <i>C. peltata</i>      | L.       | 2617             | Panama (Cerro Azul)         | Pistillate    | 9°11'10" N, 79°24'21" W | 07/21/2016 |
| CP-4 | <i>C. peltata</i>      | L.       | 2624             | Panama (Cerro Azul)         | Staminate     | 9°11'10" N, 79°24'21" W | 07/21/2016 |
| CI-1 | <i>C. insignis</i>     | Liebm.   | 2520             | Panama (Cerro Azul)         | Undetermined  | 9°11'10" N, 79°24'21" W | 10/11/2015 |
| CI-2 | <i>C. insignis</i>     | Liebm.   | 2621             | Panama (Cerro Azul)         | Undetermined  | 9°11'10" N, 79°24'21" W | 07/21/2016 |
| CI-3 | <i>C. insignis</i>     | Liebm.   | 2618             | West Panama (Cerro Campana) | Undetermined  | 8°41'11" N, 79°55'19" W | 07/22/2016 |
| CH-1 | <i>C. hispidissima</i> | Cuatrec. | 2518             | Panama (Cerro Azul)         | Pistillate    | 9°11'10" N, 79°24'21" W | 10/11/2015 |
| CH-2 | <i>C. hispidissima</i> | Cuatrec. | 2619             | Panama (Cerro Azul)         | Pistillate    | 9°11'10" N, 79°24'21" W | 07/21/2016 |

**Figure S1.** *Cecropia* samples collection points in Panama.

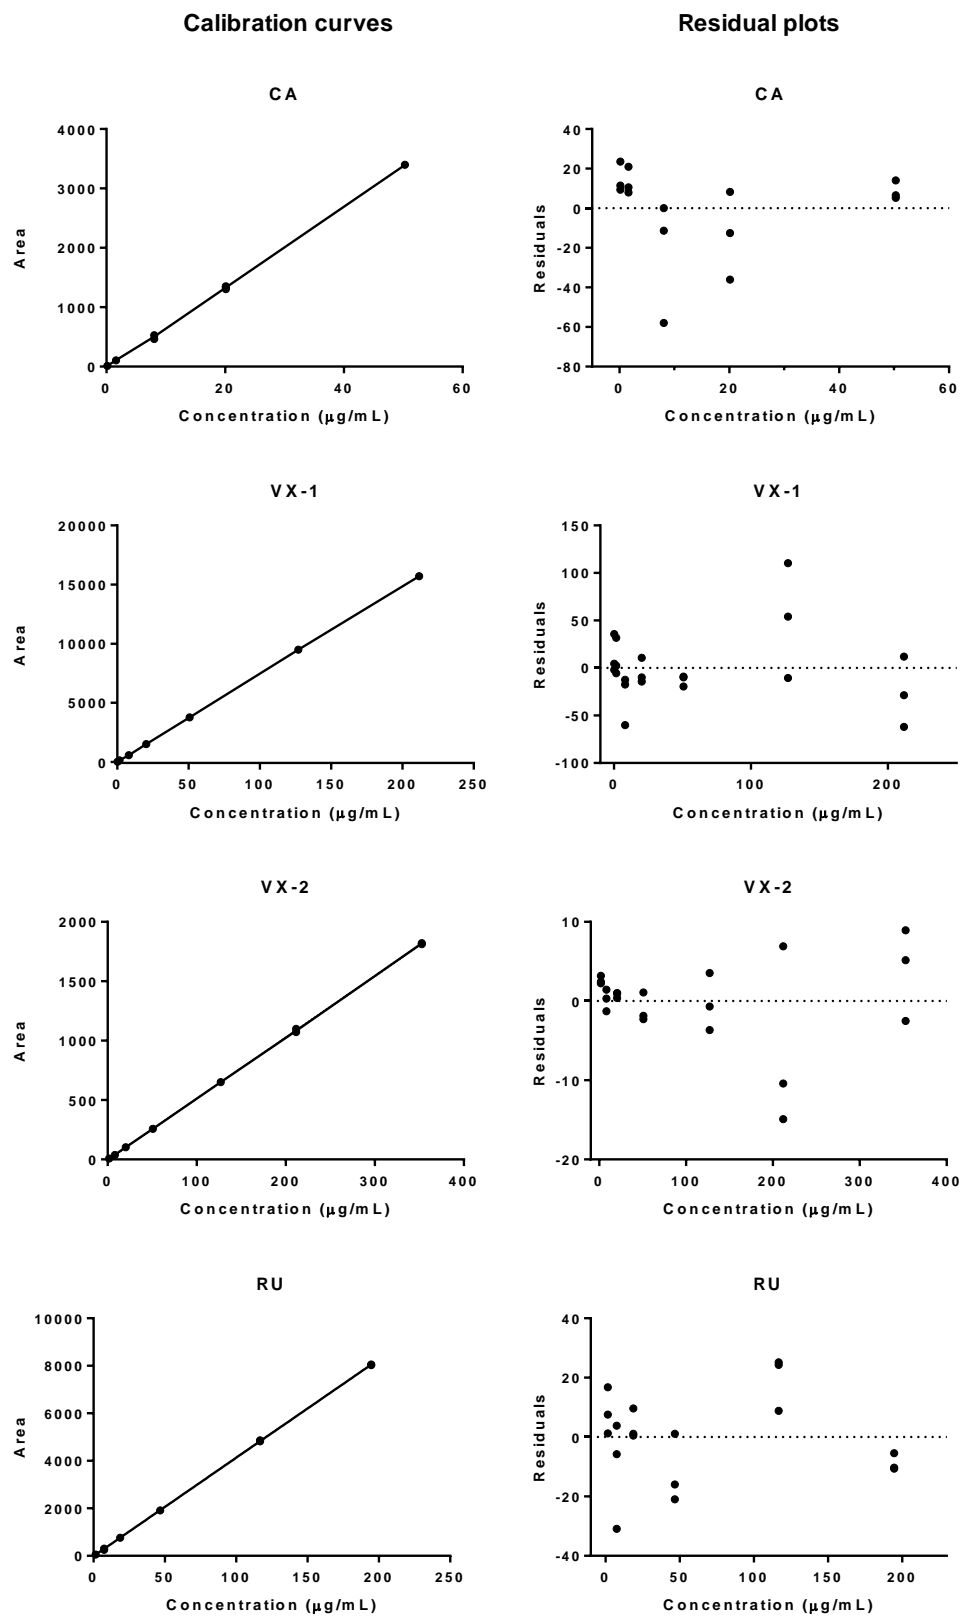

**Figure S2.** Calibration curves and residual plots for CA, VX-1, VX-2 and RU.

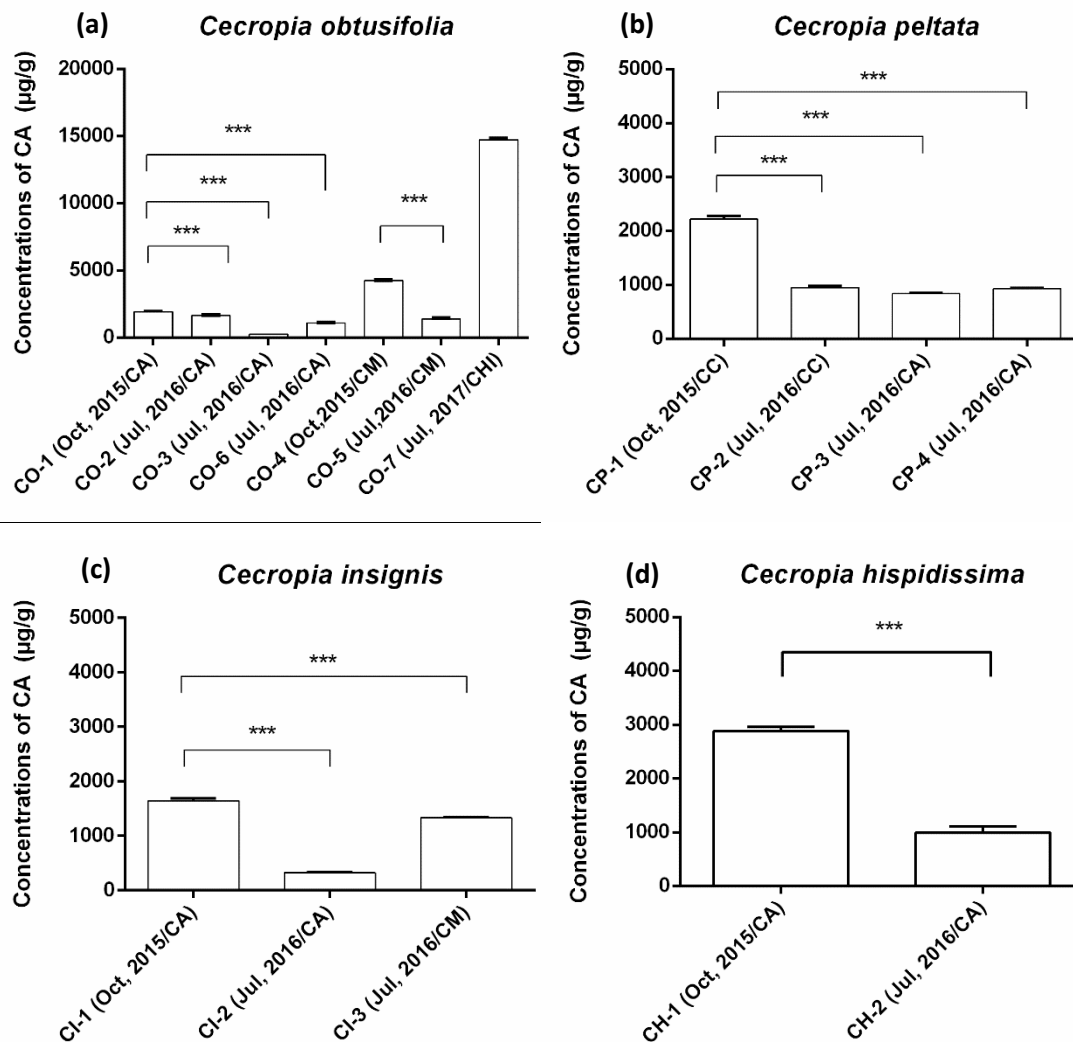

**Figure S3.** Concentrations of chlorogenic acid (CA) ( $\mu\text{g/g}$ ) in authentic *Cecropia* leaf samples. (a) *Cecropia obtusifolia*, (b) *Cecropia peltata*, (c) *Cecropia insignis*, and (d) *Cecropia hispidissima*. The error bar was calculated from the standard deviation (SD) of the mean. The comparison between groups was assessed by one-way analysis of variance (ANOVA) followed by Tukey test or t-test. Values of  $p < 0.05$  were considered as statistically different. \*\*\* =  $p < 0.001$ . CA = Cerro Azul, CM = Cerro Campana, CC = Caminio de Cruces, CHI = Chiriqui.



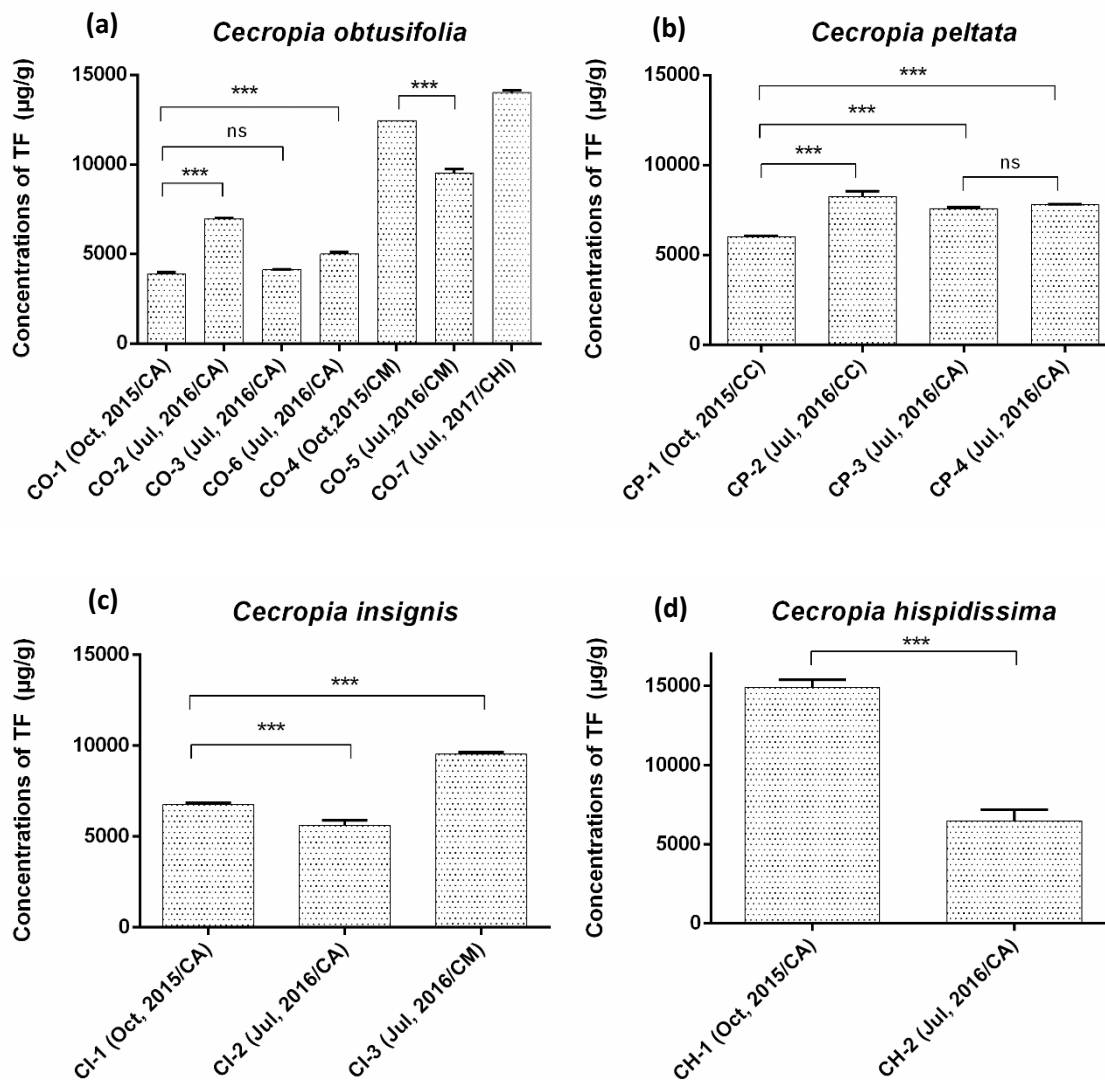

**Figure S4.** Concentrations of TF (total flavonoid) ( $\mu\text{g/g}$ ) in authentic *Cecropia* leaf samples. (a) *Cecropia obtusifolia*, (b) *Cecropia peltata*, (c) *Cecropia insignis*, and (d) *Cecropia hispidissima*. The error bar was calculated from the standard deviation (SD) of the mean. The comparison between groups was assessed by one-way analysis of variance (ANOVA) followed by Tukey test or t-test. Values of  $p < 0.05$  were considered as statistically different. \*\*\* =  $p < 0.001$ , ns = no significant difference. CA = Cerro Azul, CM = Cerro Campana, CC = Camino de Cruces, CHI = Chiriqui.

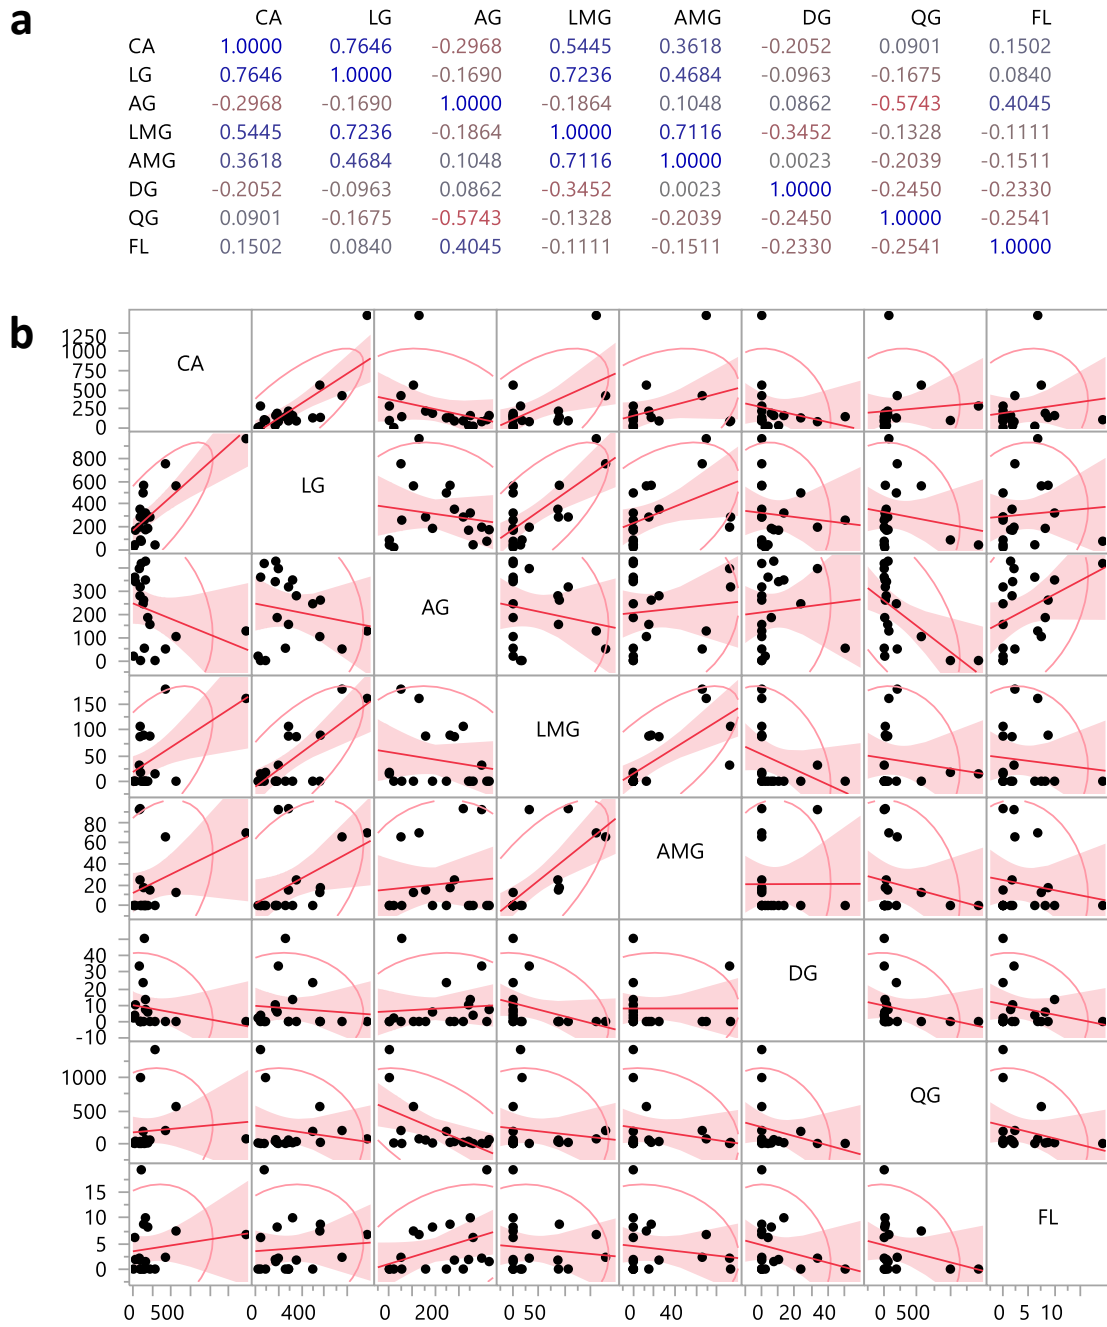

**Fig. S5.** Correlation analysis. a) Correlations table and b) Multivariate Scatterplot Matrix.

**Table S1.** Fractional factorial design ( $2^{7-3}$ ) for *Cecropia* species leaves extractions. Factors: A) methanol fraction (% v/v), B) extraction time (min), C) number of extractions, D) temperature ( $^{\circ}\text{C}$ ), E) mass:solvent ratio (w/v), F) number of acetone extractions, and G) particle size ( $\mu\text{m}$ ). Responses: sum of peak areas of total flavonoids (TF), chlorogenic acid (CA) and flavonolignans (FL). The responses are represented as mean  $\pm$  SD (n = 2).

| Exp. No. | Factors |    |   |    |     |   |            | Responses (Area)   |                 |                |
|----------|---------|----|---|----|-----|---|------------|--------------------|-----------------|----------------|
|          | A       | B  | C | D  | E   | F | G          | TF                 | CA              | FL             |
| 1        | 50      | 30 | 1 | 20 | 20  | 0 | $\leq 125$ | 1077.5 $\pm$ 37.9  | 199.2 $\pm$ 4.3 | 3.0 $\pm$ 0.01 |
| 2        | 90      | 30 | 1 | 20 | 100 | 0 | $\leq 710$ | 902.1 $\pm$ 27.6   | 186.7 $\pm$ 4.2 | 7.9 $\pm$ 0.4  |
| 3        | 50      | 90 | 1 | 20 | 100 | 2 | $\leq 125$ | 1480.0 $\pm$ 29.3  | 288.7 $\pm$ 1.2 | 7.5 $\pm$ 1.0  |
| 4        | 90      | 90 | 1 | 20 | 20  | 2 | $\leq 710$ | 848.0 $\pm$ 9.9    | 145.9 $\pm$ 4.5 | 9.6 $\pm$ 0.7  |
| 5        | 50      | 30 | 3 | 20 | 100 | 2 | $\leq 710$ | 1378.6 $\pm$ 129.4 | 282.6 $\pm$ 2.8 | 8.5 $\pm$ 1.6  |
| 6        | 90      | 30 | 3 | 20 | 20  | 2 | $\leq 125$ | 1183.2 $\pm$ 8.6   | 231.8 $\pm$ 1.4 | 10.8 $\pm$ 0.1 |
| 7        | 50      | 90 | 3 | 20 | 20  | 0 | $\leq 710$ | 1439.7 $\pm$ 5.6   | 261.0 $\pm$ 2.8 | 6.5 $\pm$ 0.3  |
| 8        | 90      | 90 | 3 | 20 | 100 | 0 | $\leq 125$ | 1298.4 $\pm$ 62.9  | 271.8 $\pm$ 4.4 | 9.8 $\pm$ 1.0  |
| 9        | 50      | 30 | 1 | 60 | 20  | 2 | $\leq 710$ | 1406.9 $\pm$ 29.2  | 249.0 $\pm$ 1.1 | 10.0 $\pm$ 0.7 |
| 10       | 90      | 30 | 1 | 60 | 100 | 2 | $\leq 125$ | 1516.5 $\pm$ 38.3  | 276.7 $\pm$ 1.2 | 12.3 $\pm$ 0.3 |
| 11       | 50      | 90 | 1 | 60 | 100 | 0 | $\leq 710$ | 1442.3 $\pm$ 5.7   | 311.7 $\pm$ 8.6 | 8.4 $\pm$ 0.4  |
| 12       | 90      | 90 | 1 | 60 | 20  | 0 | $\leq 125$ | 1511.8 $\pm$ 56.1  | 268.1 $\pm$ 9.0 | 9.7 $\pm$ 1.6  |
| 13       | 50      | 30 | 3 | 60 | 100 | 0 | $\leq 125$ | 1664.5 $\pm$ 0.9   | 345.1 $\pm$ 0.3 | 11.8 $\pm$ 0.3 |
| 14       | 90      | 30 | 3 | 60 | 20  | 0 | $\leq 710$ | 1363.3 $\pm$ 24.1  | 275.3 $\pm$ 5.8 | 12.0 $\pm$ 0.7 |
| 15       | 50      | 90 | 3 | 60 | 20  | 2 | $\leq 125$ | 1654.5 $\pm$ 6.2   | 346.4 $\pm$ 3.4 | 11.1 $\pm$ 0.6 |
| 16       | 90      | 90 | 3 | 60 | 100 | 2 | $\leq 710$ | 1434.5 $\pm$ 15.8  | 307.2 $\pm$ 2.9 | 12.8 $\pm$ 0.2 |
| 17       | 70      | 60 | 2 | 40 | 60  | 1 | $\leq 355$ | 15856.0 $\pm$ 15.5 | 305.1 $\pm$ 8.8 | 11.7 $\pm$ 0.5 |
| 18       | 70      | 60 | 2 | 40 | 60  | 1 | $\leq 355$ | 1546.1 $\pm$ 6.1   | 305.1 $\pm$ 8.2 | 11.9 $\pm$ 0.2 |
| 19       | 70      | 60 | 2 | 40 | 60  | 1 | $\leq 355$ | 1579.2 $\pm$ 11.5  | 307.2 $\pm$ 1.5 | 12.4 $\pm$ 0.6 |

**Table S2.** Independent variables (factors) and their levels employed in CCD for the optimization of *Cecropia* species leaves extraction.

| Coded level | Factors                                     |                                              |
|-------------|---------------------------------------------|----------------------------------------------|
|             | X <sub>1</sub> , methanol concentration (%) | X <sub>2</sub> , extraction temperature (°C) |
| - $\alpha$  | 42                                          | 36                                           |
| -1          | 50                                          | 40                                           |
| 0           | 70                                          | 50                                           |
| 1           | 90                                          | 60                                           |
| + $\alpha$  | 98                                          | 64                                           |

**Table S3.** Central composite design (CCD) for two factors and the measured responses for the optimization of the *Cecropia* species leaves extraction. The responses are represented as mean  $\pm$  SD (n = 2).

| Exp. No. | Factor levels |    | Responses (Area)  |                 |                |
|----------|---------------|----|-------------------|-----------------|----------------|
|          | X1            | X2 | TF                | CA              | FL             |
| 1        | 50            | 40 | 1711.8 $\pm$ 3.9  | 319.0 $\pm$ 4.7 | 12.0 $\pm$ 0.1 |
| 2        | 90            | 40 | 1464.8 $\pm$ 9.1  | 276.0 $\pm$ 6.4 | 13.2 $\pm$ 0.5 |
| 3        | 50            | 60 | 1724.5 $\pm$ 17.1 | 349.0 $\pm$ 1.5 | 12.9 $\pm$ 0.1 |
| 4        | 90            | 60 | 1666.8 $\pm$ 16.0 | 313.2 $\pm$ 5.4 | 13.4 $\pm$ 0.4 |
| 5        | 42            | 50 | 1758.5 $\pm$ 36.7 | 329.7 $\pm$ 2.5 | 12.5 $\pm$ 0.3 |
| 6        | 98            | 50 | 1373.6 $\pm$ 14.7 | 260.7 $\pm$ 3.1 | 13.3 $\pm$ 0.5 |
| 7        | 70            | 36 | 1678.3 $\pm$ 15.0 | 319.2 $\pm$ 4.1 | 13.1 $\pm$ 0.5 |
| 8        | 70            | 64 | 1774.1 $\pm$ 44.5 | 354.4 $\pm$ 3.7 | 14.1 $\pm$ 0.3 |
| 9        | 70            | 50 | 1737.8 $\pm$ 13.0 | 340.7 $\pm$ 0.2 | 13.6 $\pm$ 0.5 |

**Table S4.** Cochran's test for the determination of homogeneity of CA, TF and FL variances during 4 days and at three concentration levels. n=6, overall repeatability: intra days and levels, intermediate precision: inter days and levels. Overall variances were homogenous according Cochran's test (95% confidence level). <sup>a</sup> TF expressed as VX equivalent (*C. species mixture*). <sup>b</sup> TF expressed as rutin equivalent (*C. hispidissima*).

| Analyte           | Variances (S <sup>2</sup> ) |          |          |          |                     |          | Cochran's test |                |
|-------------------|-----------------------------|----------|----------|----------|---------------------|----------|----------------|----------------|
|                   | Day (100%)                  |          |          |          | Concentration level |          | Test value     | Critical value |
|                   | 1                           | 2        | 3        | 4        | 50%                 | 150%     |                |                |
| CA                | 7.99E-07                    | 1.57E-06 | 1.72E-06 | 6.91E-07 | 9.50E-07            | 1.11E-06 | 0.251          | 0.445          |
| TF-1 <sup>a</sup> | 1.60E-05                    | 3.79E-06 | 9.37E-06 | 1.46E-05 | 2.58E-05            | 1.39E-05 | 0.309          |                |
| TF-2 <sup>b</sup> | 9.63E-06                    | 1.08E-05 | 1.65E-05 | 9.41E-06 | 1.04E-05            | 8.35E-06 | 0.253          |                |
| FL                | 3.52E-07                    | 4.24E-07 | 6.58E-07 | 2.08E-07 | 1.94E-07            | 4.62E-07 | 0.359          |                |

**Table S5.** Determination of LoD and LoQ of CA, VX and RU. Where: Limit of detection (LoD), limit of quantification (LoQ), calibration curve method (CCM), and experimental data (ED). <sup>a</sup>Analyte detected at 340 nm. <sup>b</sup>Analyte detected at 390 nm.

| Analyte           | LoD (ng/mL) |                 | LoQ (ng/mL) |             |
|-------------------|-------------|-----------------|-------------|-------------|
|                   | CCM         | ED ( S/N ratio) | CCM         | ED (%RSD)   |
| CA <sup>a</sup>   | 394.2       | 160.7 (3.4)     | 1194.6      | 401.9 (5.0) |
| VX-1 <sup>a</sup> | 346.1       | 131.2 (3.0)     | 1048.7      | 328.0 (5.0) |
| VX-2 <sup>b</sup> | 310.9       | 423.6 (2.1)     | 942.2       | 903.8 (2.0) |
| RU <sup>a</sup>   | 467.2       | 131.0 (2.1)     | 1415.9      | 388.6 (2.9) |

**Table S6.**

Concentrations of chlorogenic acid (CA), luteolin *C*-glycosydes/ luteolin *C,O*-glycosydes (LG), apigenin *C*-glycosydes/ apigenin *C,O*-glycosydes (AG), luteolin malonyl-*C*-glycosydes (LMG), apigenin malonyl-*C,O*-glycosydes (AMG), diosmetin *C,O*-glycosydes (DG), quercetin *O*-glycosydes and flavonolignans (FL) ( $\mu\text{g/g}$ ) in authentic and commercial *Cecropia* leaf samples. CO, CP, CI and CH correspond to authentic leaves of *C. obtusifolia*, *C. peltata*, *C. insignis* and *C. hispidissima* samples (see Fig. S1). CO-C, CP-C and CHO-C correspond to commercial products of *C. obtusifolia*, *C. peltata* and *C. hololeuca*. Contents of analytes are reported as mean (n = 3). Content below the limit of quantification: <LOQ.

|              | CA      | LG     | AG     | LMG    | AMG   | DG    | QG      | FL    |
|--------------|---------|--------|--------|--------|-------|-------|---------|-------|
| <b>CO-1</b>  | 1933.2  | 1889.2 | 1871.1 | <LOQ   | <LOQ  | 58.0  | 72.9    | 82.3  |
| <b>CO-2</b>  | 1634.0  | 3229.6 | 3510.1 | <LOQ   | <LOQ  | 134.1 | 112.9   | 100.6 |
| <b>CO-3</b>  | 243.6   | 458.2  | 3631.6 | <LOQ   | <LOQ  | 38.1  | <LOQ    | 61.9  |
| <b>CO-4</b>  | 4238.1  | 7517.0 | 502.8  | 1805.1 | 657.8 | <LOQ  | 1972.8  | 23.1  |
| <b>CO-5</b>  | 1393.3  | 5639.8 | 2631.6 | 902.2  | 171.3 | <LOQ  | 168.4   | 87.9  |
| <b>CO-6</b>  | 1091.5  | 767.3  | 4227.5 | <LOQ   | <LOQ  | <LOQ  | <LOQ    | 194.6 |
| <b>CO-7</b>  | 14724.5 | 9701.5 | 1286.4 | 1622.9 | 696.2 | <LOQ  | 704.7   | 67.7  |
| <b>CO-C</b>  | 5612.6  | 5590.0 | 1044.2 | <LOQ   | 124.9 | <LOQ  | 5628.0  | 74.6  |
| <b>CP-1</b>  | 2217.8  | 2873.1 | 1571.8 | 884.6  | 148.4 | <LOQ  | 524.8   | <LOQ  |
| <b>CP-2</b>  | 949.0   | 2877.2 | 3205.6 | 1075.6 | 928.4 | <LOQ  | 161.3   | <LOQ  |
| <b>CP-3</b>  | 836.3   | 1992.5 | 4004.8 | 315.0  | 919.0 | 338.2 | <LOQ    | 21.4  |
| <b>CP-4</b>  | 927.5   | 3556.0 | 2821.0 | 873.3  | 245.5 | <LOQ  | 294.9   | 17.6  |
| <b>CP-C</b>  | 78.7    | 234.2  | 191.3  | <LOQ   | <LOQ  | 21.2  | 77.4    | <LOQ  |
| <b>CI-1</b>  | 1644.1  | 1769.3 | 4327.5 | <LOQ   | <LOQ  | 73.0  | 580.3   | 14.7  |
| <b>CI-2</b>  | 323.4   | 1726.3 | 3435.8 | <LOQ   | <LOQ  | 102.1 | 341.4   | 18.7  |
| <b>CI-3</b>  | 1331.8  | 4976.4 | 2473.1 | <LOQ   | <LOQ  | 237.0 | 1842.2  | <LOQ  |
| <b>CH-1</b>  | 2881.9  | 444.2  | <LOQ   | 144.9  | <LOQ  | <LOQ  | 14310.2 | <LOQ  |
| <b>CH-2</b>  | 993.9   | 882.0  | <LOQ   | 173.6  | <LOQ  | <LOQ  | 10044.0 | <LOQ  |
| <b>CHO-C</b> | 1492.6  | 2606.7 | 537.1  | <LOQ   | <LOQ  | 506.7 | <LOQ    | <LOQ  |
